# Supplementary material
Source: Springer Nature journal article supplement (https://www.springermedizin.de/resource/supplementary/12936_2009_910_MOESM6_ESM.pdf/9548518)

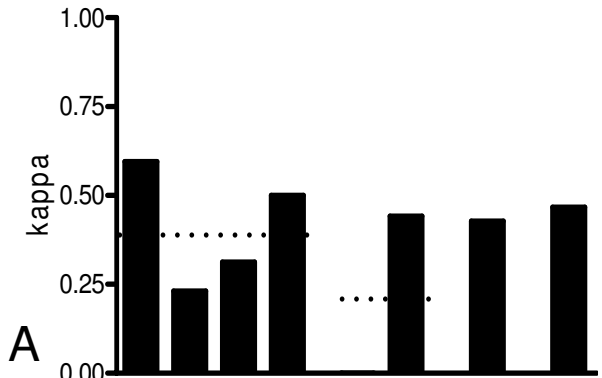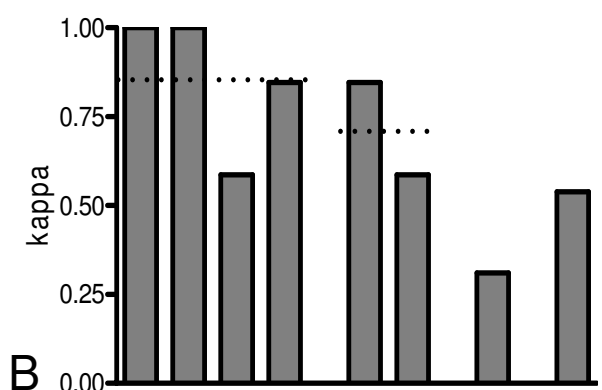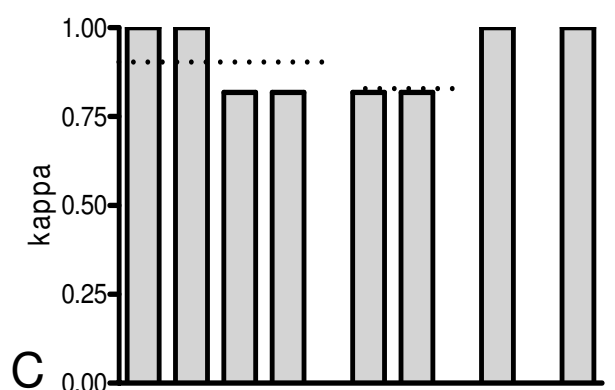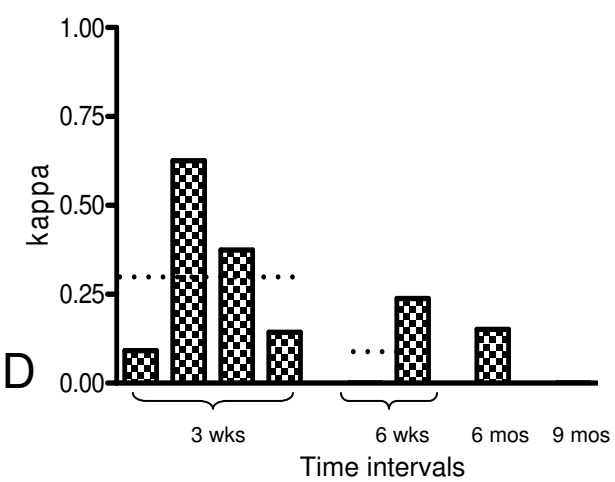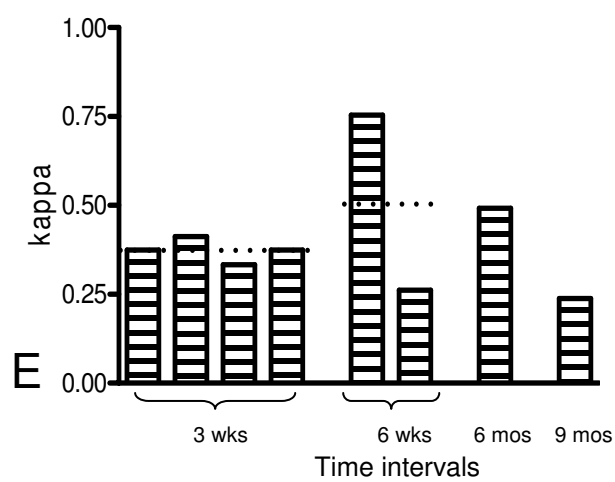

Supplement: MOESM6 [file 9548518]
